# Supplementary material for: Estimation of the Number of General Anesthesia Cases Based on a Series of Nationwide Surveys on Twitter during COVID-19 Pandemic in Japan: A Statistical Analysis
Source: Medicina (Kaunas). 2021 Feb 8;57(2):153. doi: 10.3390/medicina57020153 (PMC7915187; doi:10.3390/medicina57020153)
Supplement: Supplementary file 1 [file medicina-57-00153-s001.pdf]

Supplementary Information S1

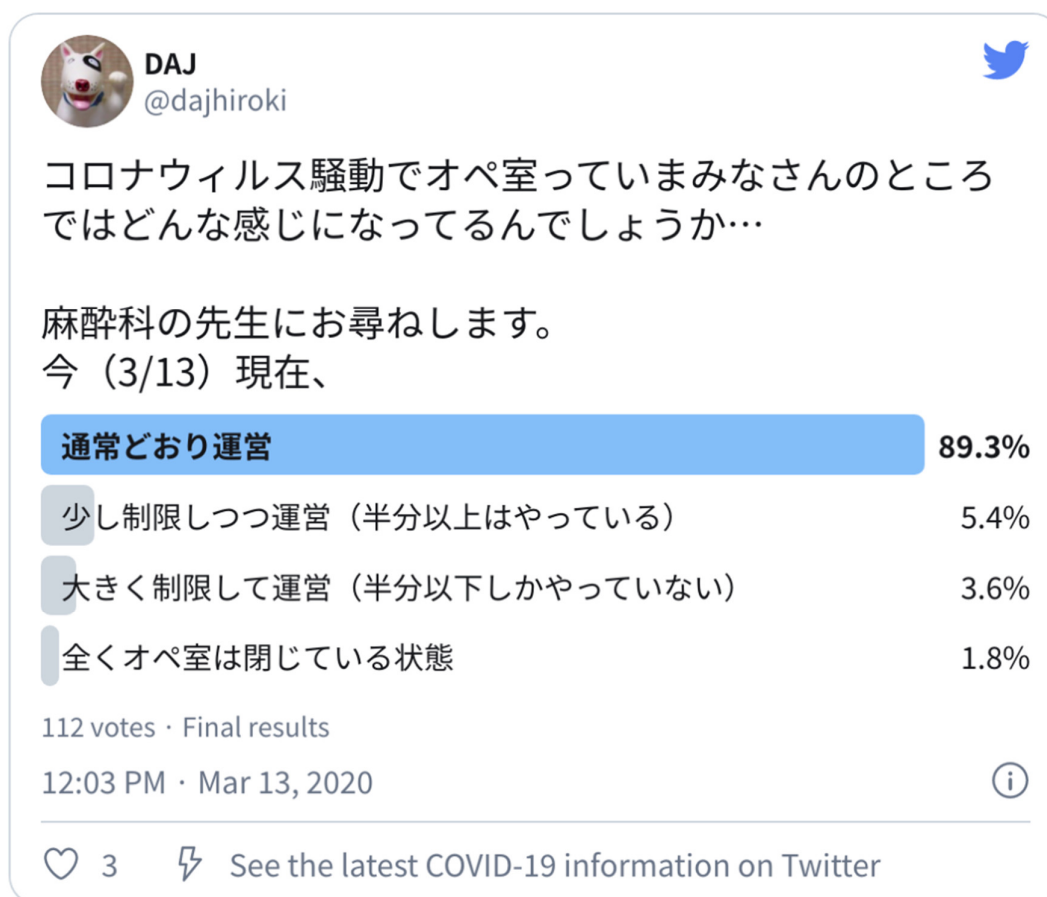

DAJ @dajhiroki

How is your operation room in coronavirus pandemic?

I would ask anesthesiologists the question. As of 13 March (3/13),

|                                                                     |       |
|---------------------------------------------------------------------|-------|
| Operating as usual                                                  | 89.3% |
| Operating with partial restrictions (more than half of the usual)   | 5.4%  |
| Operating with extensive restrictions (less than half of the usual) | 3.6%  |
| Operation room is completely closed.                                | 1.8%  |

<https://twitter.com/dajhiroki/status/1238299708059074562>

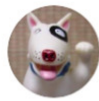

DAJ  
@dajhiroki

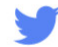

コロナウィルス騒動、全国のオペ室はどうなっているのかアンケート第二弾

麻酔科の先生にお尋ねします。  
手術室は、

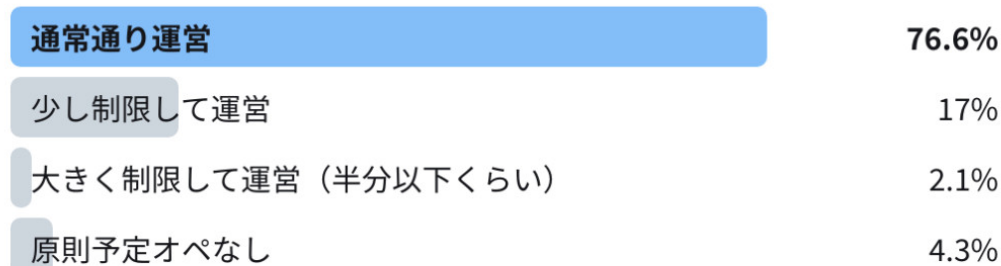

47 votes · Final results

7:51 AM · Mar 20, 2020

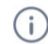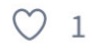

1

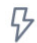

See the latest COVID-19 information on Twitter

DAJ @dajhiroki

How is your operation room in coronavirus pandemic? The second trial.

I would ask anesthesiologists the question. Operation room performs...

|                                                                      |       |
|----------------------------------------------------------------------|-------|
| Operating as usual                                                   | 76.6% |
| Operating with partial restrictions                                  | 17%   |
| Operating with extensive restrictions (approximately less than half) | 2.1%  |
| As a general rule, no surgery                                        | 4.3%  |

<https://twitter.com/dajhiroki/status/1240772960924794880>

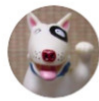

DAJ  
@dajhiroki

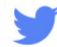

コロナウィルス騒動で全国のオペ室今どうなってるのか  
アンケート 3 回目

全国の麻酔科の先生におたずねします。  
今 (3/27) 現在、オペ室は、

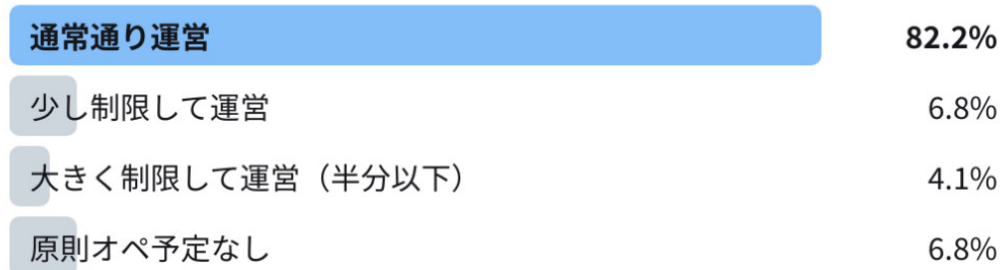

73 votes · Final results

9:03 AM · Mar 27, 2020

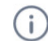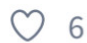

6

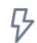

See the latest COVID-19 information on Twitter

DAJ @dajhiroki

How is your operation room in coronavirus pandemic? The third trial.

I would ask anesthesiologists the question. As of 27 March (3/27), operation room performs...

|                                                        |       |
|--------------------------------------------------------|-------|
| Operating as usual                                     | 82.2% |
| Operating with partial restrictions                    | 6.8%  |
| Operating with extensive restrictions (less than half) | 4.1%  |
| As a general rule, no surgery                          | 6.8%  |

<https://twitter.com/dajhiroki/status/1243327743040745472>

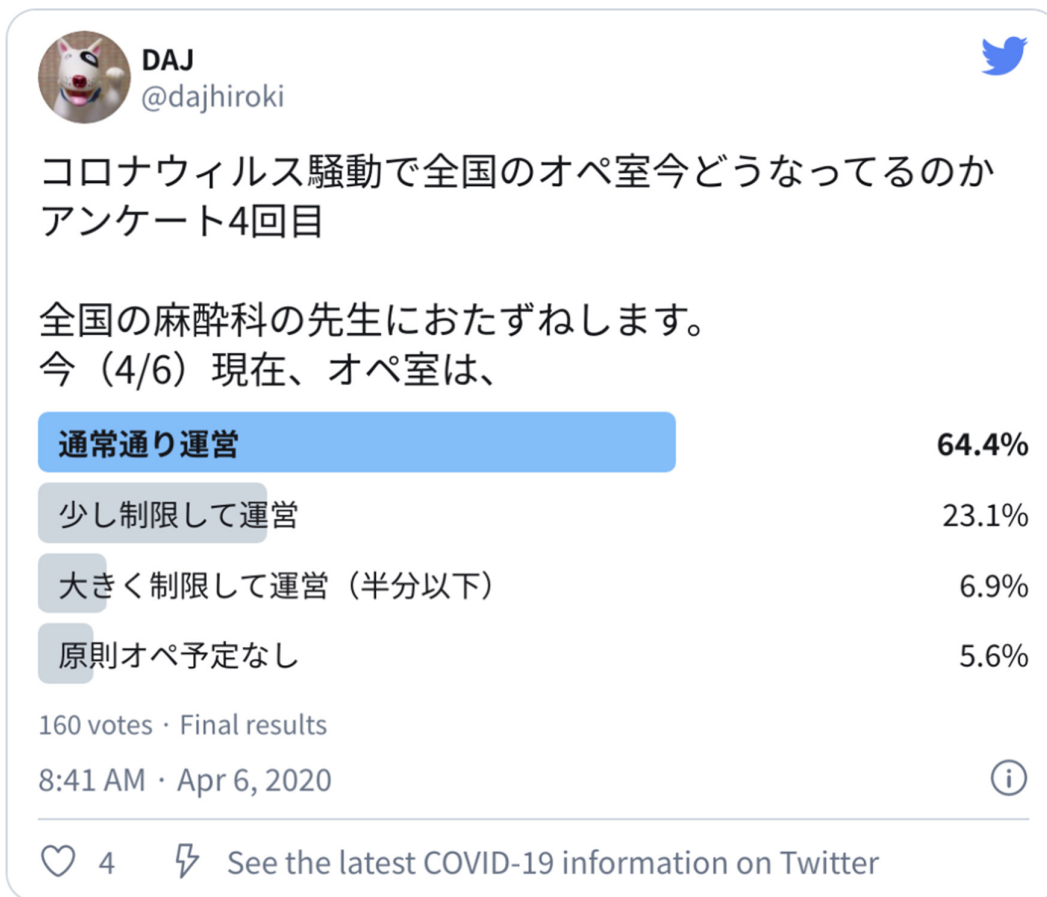

DAJ @dajhiroki

How is your operation room in coronavirus pandemic? The fourth trial.

I would ask anesthesiologists the question. As of 6 April (4/6), operation room performs...

|                                                        |       |
|--------------------------------------------------------|-------|
| Operating as usual                                     | 64.4% |
| Operating with partial restrictions                    | 23.1% |
| Operating with extensive restrictions (less than half) | 6.9%  |
| As a general rule, no surgery                          | 5.6%  |

<https://twitter.com/dajhiroki/status/1246946140630552576>

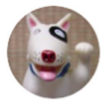

DAJ  
@dajhiroki

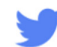

コロナウィルス騒動で全国のオペ室今どうなってるのか  
アンケート5回目

全国の麻酔科の先生におたずねします。  
今（4/10）現在、オペ室は、

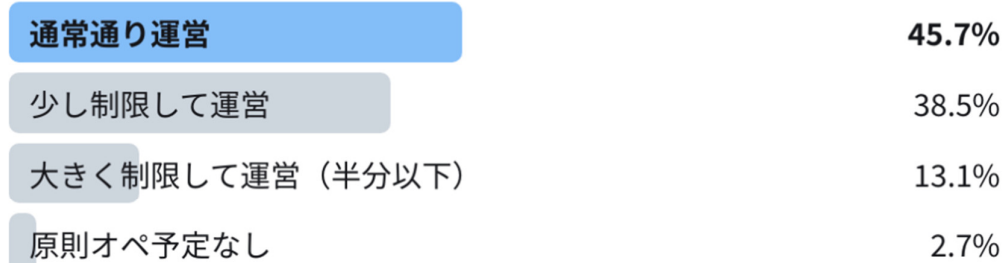

221 votes · Final results

12:13 PM · Apr 10, 2020

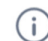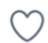

1

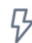

See the latest COVID-19 information on Twitter

DAJ @dajhiroki

How is your operation room in coronavirus pandemic? The fifth trial.

I would ask anesthesiologists the question. As of 10 April (4/10), operation room performs...

|                                                        |       |
|--------------------------------------------------------|-------|
| Operating as usual                                     | 45.7% |
| Operating with partial restrictions                    | 38.5% |
| Operating with extensive restrictions (less than half) | 13.1% |
| As a general rule, no surgery                          | 2.7%  |

<https://twitter.com/dajhiroki/status/1248448870377373697>

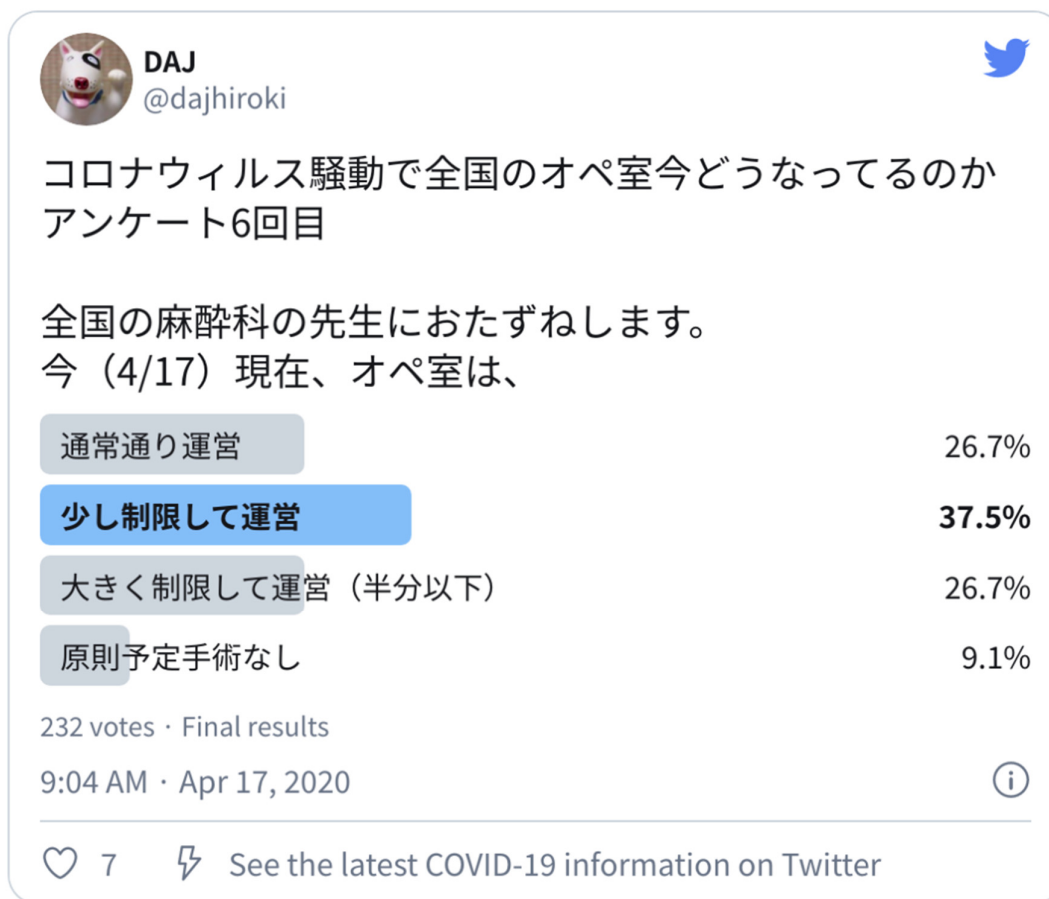

DAJ @dajhiroki

How is your operation room in coronavirus pandemic? The sixth trial.

I would ask anesthesiologists the question. As of 17 April (4/17), operation room performs...

|                                                        |       |
|--------------------------------------------------------|-------|
| Operating as usual                                     | 26.7% |
| Operating with partial restrictions                    | 37.5% |
| Operating with extensive restrictions (less than half) | 26.7% |
| As a general rule, no surgery                          | 9.1%  |

<https://twitter.com/dajhiroki/status/1250938192334815234>

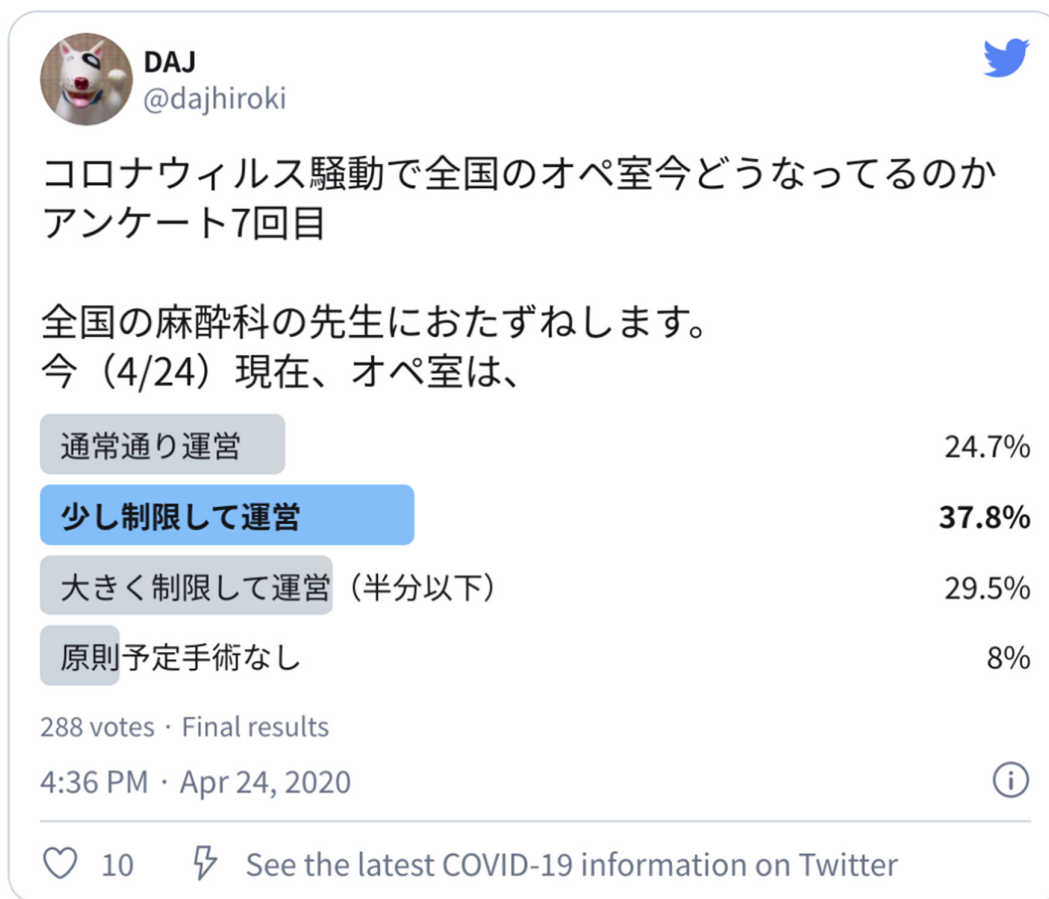

DAJ @dajhiroki

How is your operation room in coronavirus pandemic? The seventh trial.

I would ask anesthesiologists the question. As of 24 April (4/24), operation room performs...

|                                                        |       |
|--------------------------------------------------------|-------|
| Operating as usual                                     | 24.7% |
| Operating with partial restrictions                    | 37.8% |
| Operating with extensive restrictions (less than half) | 29.5% |
| As a general rule, no surgery                          | 8%    |

<https://twitter.com/dajhiroki/status/1253588554103402498>

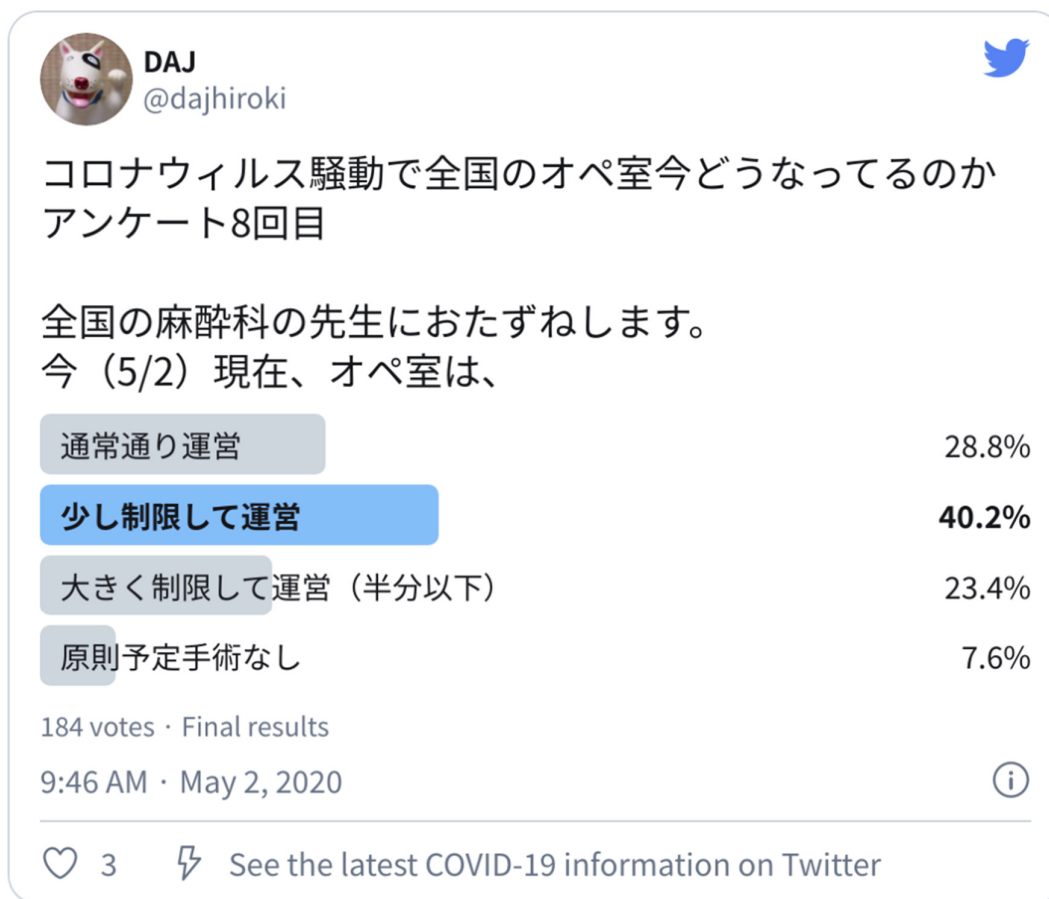

DAJ @dajhiroki

How is your operation room in coronavirus pandemic? The eighth trial.

I would ask anesthesiologists the question. As of 2 May (5/2), operation room performs...

|                                                        |       |
|--------------------------------------------------------|-------|
| Operating as usual                                     | 28.8% |
| Operating with partial restrictions                    | 40.2% |
| Operating with extensive restrictions (less than half) | 23.4% |
| As a general rule, no surgery                          | 7.6%  |

<https://twitter.com/dajhiroki/status/1256384655458107394>

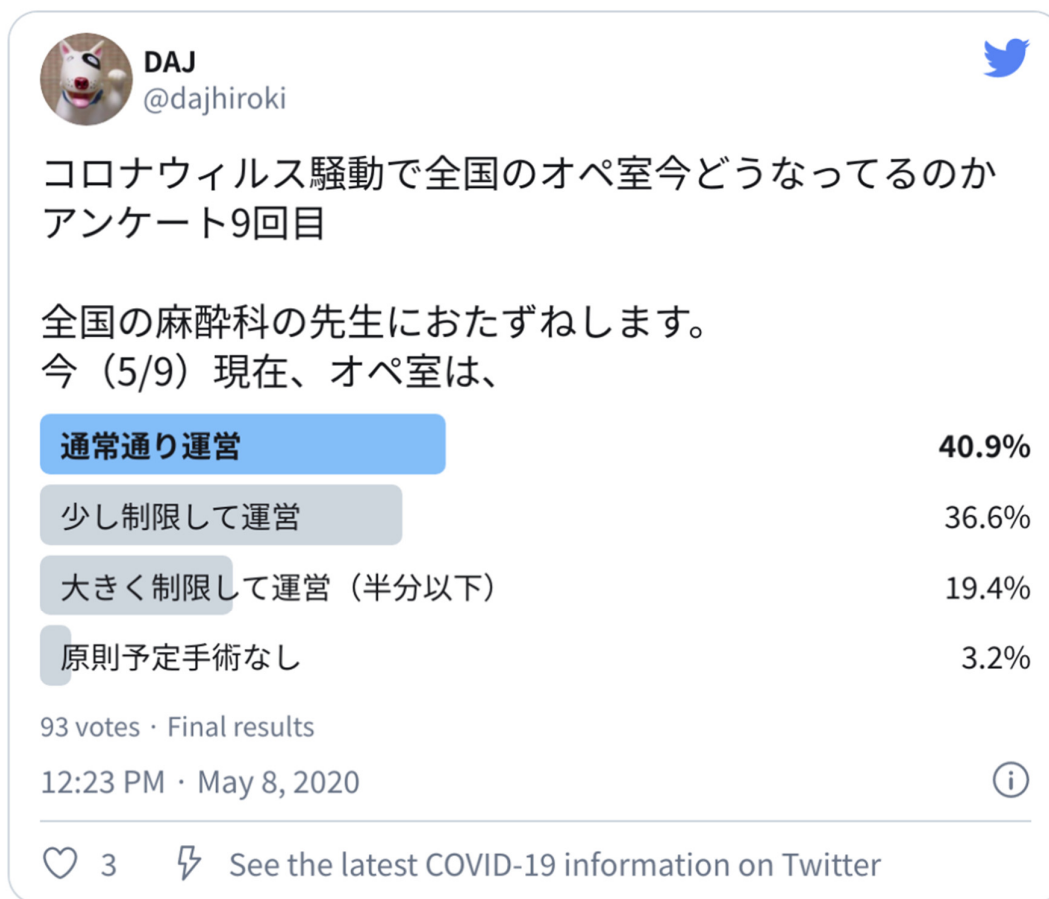

DAJ @dajhiroki

How is your operation room in coronavirus pandemic? The ninth trial.

I would ask anesthesiologists the question. As of 9 May (5/9), operation room performs...

|                                                        |       |
|--------------------------------------------------------|-------|
| Operating as usual                                     | 40.9% |
| Operating with partial restrictions                    | 36.6% |
| Operating with extensive restrictions (less than half) | 19.4% |
| As a general rule, no surgery                          | 3.2%  |

<https://twitter.com/dajhiroki/status/1258598314494136320>

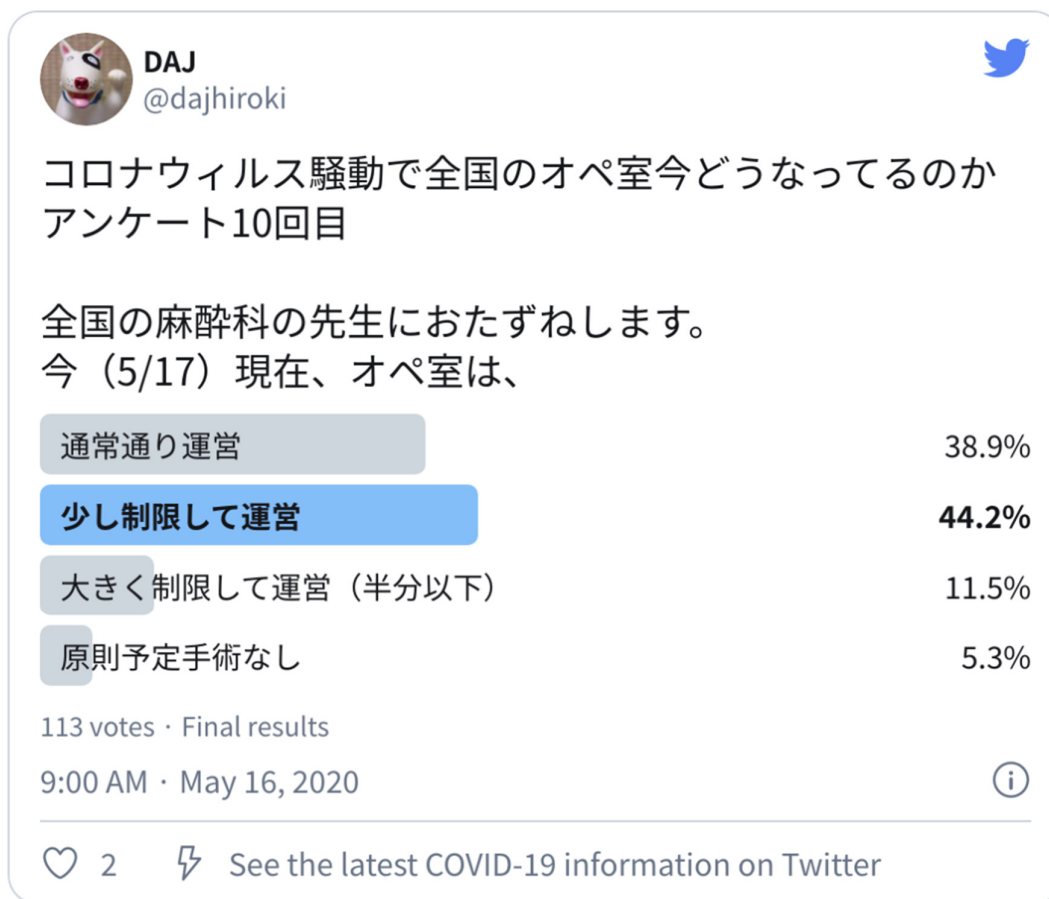

DAJ @dajhiroki

How is your operation room in coronavirus pandemic? The tenth trial.

I would ask anesthesiologists the question. As of 17 May (5/17), operation room performs...

|                                                        |       |
|--------------------------------------------------------|-------|
| Operating as usual                                     | 38.9% |
| Operating with partial restrictions                    | 44.2% |
| Operating with extensive restrictions (less than half) | 11.5% |
| As a general rule, no surgery                          | 5.3%  |

<https://twitter.com/dajhiroki/status/1261446399377301504>



DAJ  
@dajhiroki

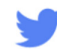

コロナウィルス騒動で全国のオペ室今どうなってるのか  
アンケート11回目

全国の麻酔科の先生におたずねします。  
今（5/22）現在、オペ室は、

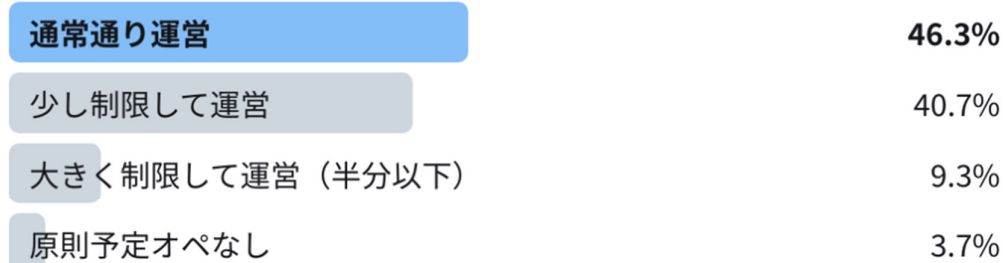

54 votes · Final results

4:52 PM · May 22, 2020

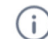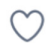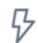

See the latest COVID-19 information on Twitter

DAJ @dajhiroki

How is your operation room in coronavirus pandemic? The eleventh trial.

I would ask anesthesiologists the question. As of 22 May (5/22), operation room performs...

|                                                        |       |
|--------------------------------------------------------|-------|
| Operating as usual                                     | 46.3% |
| Operating with partial restrictions                    | 40.7% |
| Operating with extensive restrictions (less than half) | 9.3%  |
| As a general rule, no surgery                          | 3.7%  |

<https://twitter.com/dajhiroki/status/1263739620321157120>

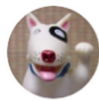

DAJ  
@dajhiroki

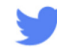

コロナウィルス騒動で全国のオペ室今どうなってるのか  
アンケート12回目

全国の麻酔科の先生におたずねします。  
今（6/19）現在、オペ室は、

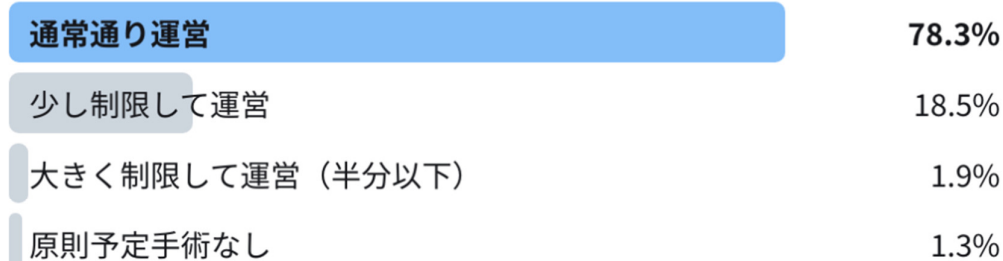

157 votes · Final results

4:09 PM · Jun 19, 2020

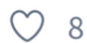

8

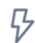

See the latest COVID-19 information on Twitter

DAJ @dajhiroki

How is your operation room in coronavirus pandemic? The twelfth trial.

I would ask anesthesiologists the question. As of 19 June (6/19), operation room performs...

|                                                        |       |
|--------------------------------------------------------|-------|
| Operating as usual                                     | 78.3% |
| Operating with partial restrictions                    | 18.5% |
| Operating with extensive restrictions (less than half) | 1.9%  |
| As a general rule, no surgery                          | 1.3%  |

<https://twitter.com/dajhiroki/status/1273875534611574785>

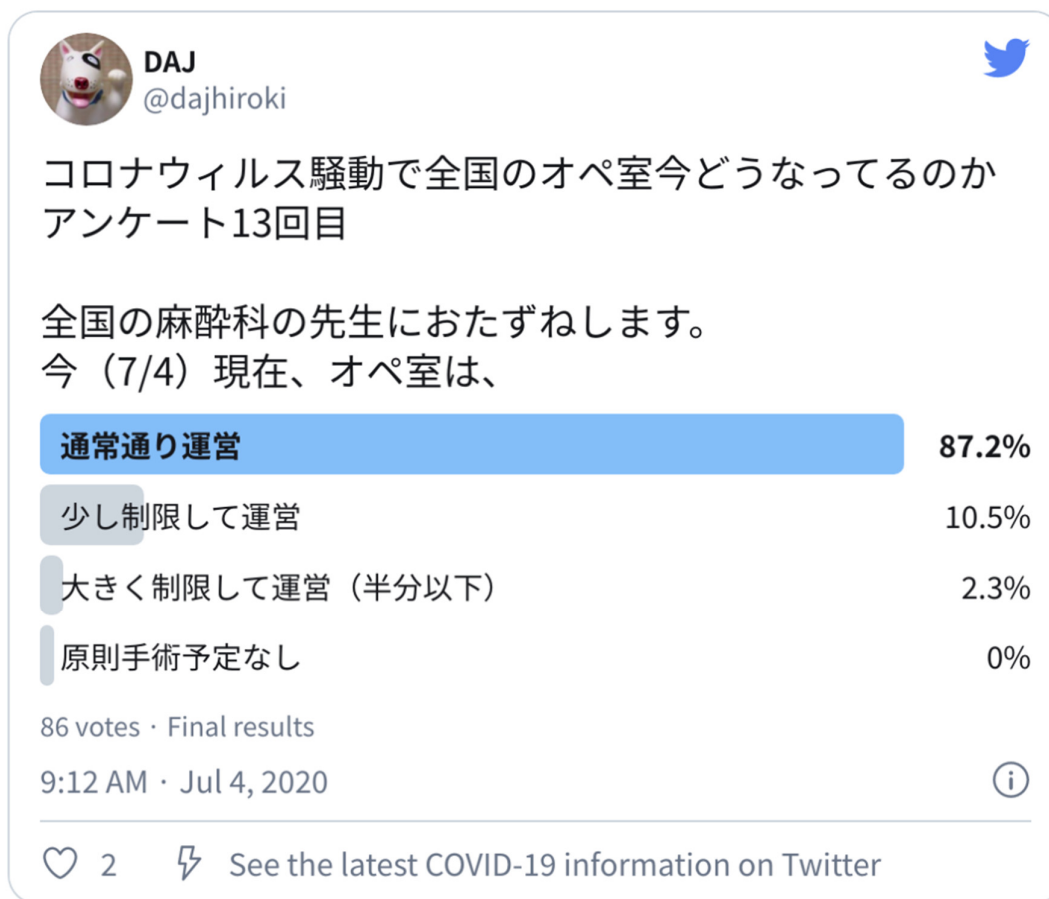

DAJ @dajhiroki

How is your operation room in coronavirus pandemic? The thirteenth trial.

I would ask anesthesiologists the question. As of 4 July (7/4), operation room performs...

|                                                        |       |
|--------------------------------------------------------|-------|
| Operating as usual                                     | 87.2% |
| Operating with partial restrictions                    | 10.5% |
| Operating with extensive restrictions (less than half) | 2.3%  |
| As a general rule, no surgery                          | 0%    |

<https://twitter.com/dajhiroki/status/1279206368981876737>



DAJ  
@dajhiroki



コロナウィルス騒動で全国のオペ室今どうなってるのか  
アンケート14回目

全国の麻酔科の先生におたずねします。  
今（7/24）現在、オペ室は、

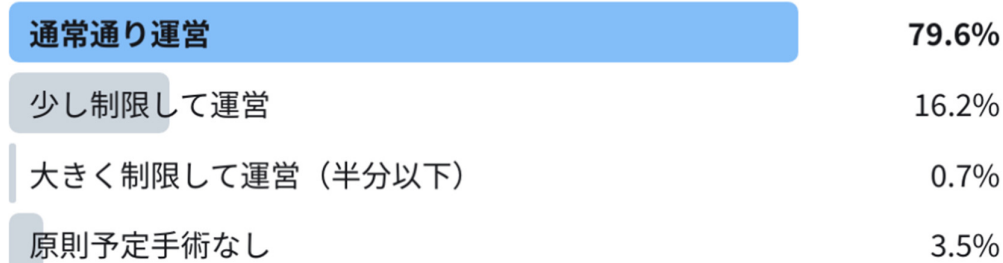

142 votes · Final results

5:42 PM · Jul 24, 2020

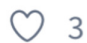

3



See the latest COVID-19 information on Twitter

DAJ @dajhiroki

How is your operation room in coronavirus pandemic? The fourteenth trial.

I would ask anesthesiologists the question. As of 24 July (7/24), operation room performs...

|                                                        |       |
|--------------------------------------------------------|-------|
| Operating as usual                                     | 76.9% |
| Operating with partial restrictions                    | 16.2% |
| Operating with extensive restrictions (less than half) | 0.7%  |
| As a general rule, no surgery                          | 3.3%  |

<https://twitter.com/dajhiroki/status/1286582435774267392>

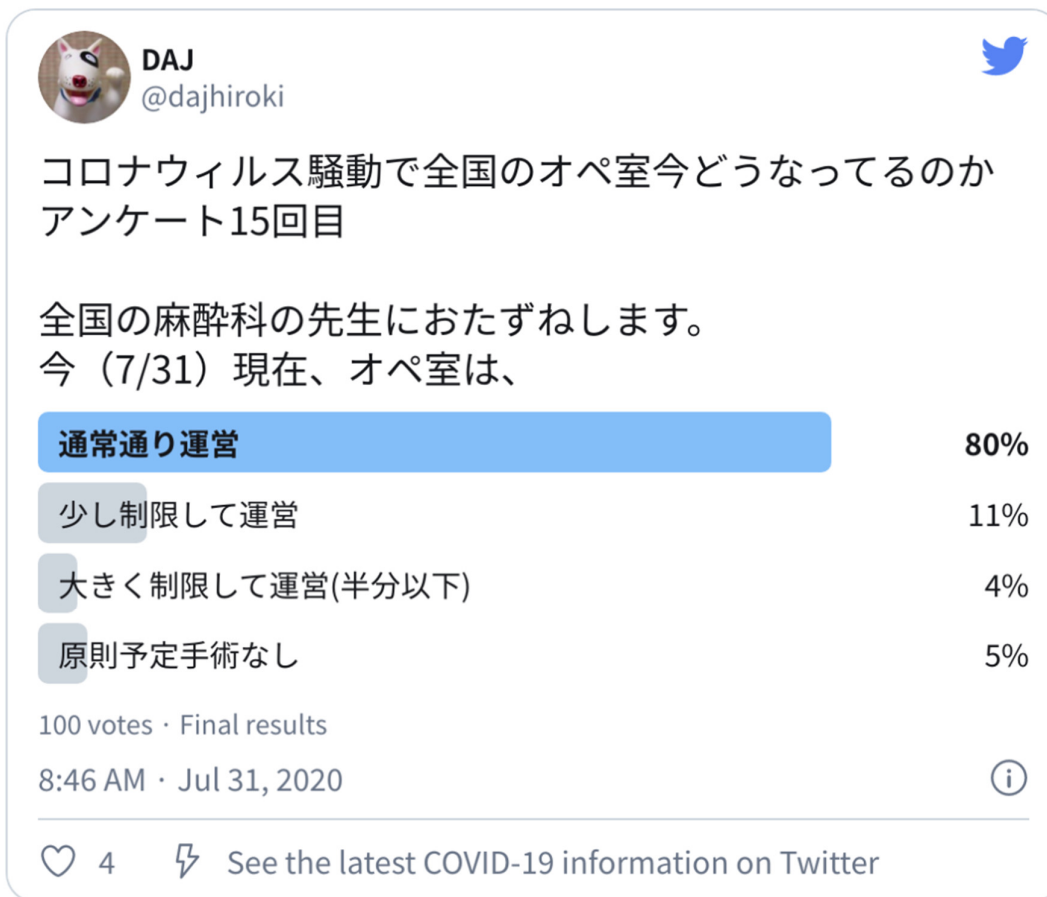

DAJ @dajhiroki

How is your operation room in coronavirus pandemic? The fifteenth trial.

I would ask anesthesiologists the question. As of 31 July (7/31), operation room performs...

|                                                        |     |
|--------------------------------------------------------|-----|
| Operating as usual                                     | 80% |
| Operating with partial restrictions                    | 11% |
| Operating with extensive restrictions (less than half) | 4%  |
| As a general rule, no surgery                          | 3%  |

<https://twitter.com/dajhiroki/status/1288984358649393152>



DAJ  
@dajhiroki



コロナウィルス騒動で全国のオペ室今どうなってるのか  
アンケート16回目

全国の麻酔科の先生におたずねします。  
今（8/7）現在、オペ室は、

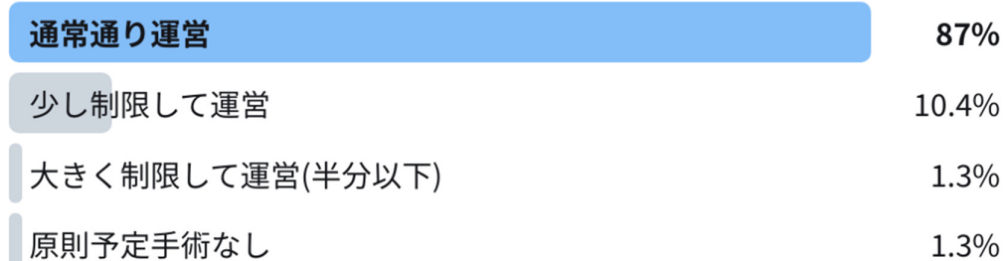

77 votes · Final results

12:20 PM · Aug 7, 2020

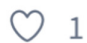

1



See the latest COVID-19 information on Twitter

DAJ @dajhiroki

How is your operation room in coronavirus pandemic? The sixteenth trial.

I would ask anesthesiologists the question. As of 7 August (8/7), operation room performs...

|                                                        |       |
|--------------------------------------------------------|-------|
| Operating as usual                                     | 87%   |
| Operating with partial restrictions                    | 10.4% |
| Operating with extensive restrictions (less than half) | 1.3%  |
| As a general rule, no surgery                          | 1.3%  |

<https://twitter.com/dajhiroki/status/1291574839338135553>



DAJ  
@dajhiroki



コロナウィルス騒動で全国のオペ室今どうなってるのか  
アンケート17回目

全国の麻酔科の先生におたずねします。  
今（8/14）現在、オペ室は、

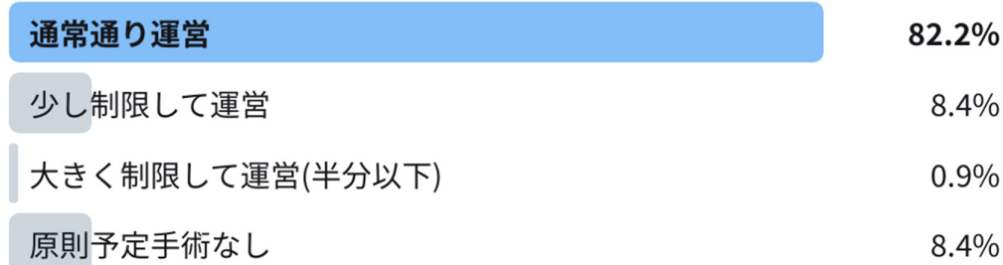

107 votes · Final results

9:00 AM · Aug 14, 2020



3



See the latest COVID-19 information on Twitter

DAJ @dajhiroki

How is your operation room in coronavirus pandemic? The seventeenth trial.

I would ask anesthesiologists the question. As of 14 August (8/14), operation room performs...

|                                                        |       |
|--------------------------------------------------------|-------|
| Operating as usual                                     | 82.2% |
| Operating with partial restrictions                    | 8.4%  |
| Operating with extensive restrictions (less than half) | 0.9%  |
| As a general rule, no surgery                          | 8.4%  |

<https://twitter.com/dajhiroki/status/1294061341154500609>
